# Supplementary material for: Trajectories of Early Adolescent Loneliness: Implications for Physical Health and Sleep
Source: Springer Nature journal article supplement (doi:10.1007/s10826-020-01804-3), 2020-08-29
Supplement: MOESM1 [file 18330706]

**Supplementary information:**

Trajectories of early adolescent loneliness: Implications for physical health and sleep.

**SI.1. Preliminary Analyses relating to SES**

Examination of stability of family income from 17 months to 10 years was examined. Chi-square analysis showed that family income was not stable across time: 65% of those who classified as “insufficient” when the child was 17 months were classified as “sufficient” when the child was 10 years old (χ2 (1) = 159.62, *p < .001*). Those findings are in line with the trend data reported by Sequin (2012), whereby family affluence improves over time within the QLSCD sample. Preliminary analyses were conducted to examine the relationship between early family income and the outcome variables relating to health and sleep. Through Welch tests to account for unequal sample sizes, early family income was significantly related to perceived general health (*p* = .004), but not the other health and sleep outcomes. However, considering the importance of the early family affluence during the first few years of life (Dearing, 2008; Duncan, Yeung, Brooks-Gunn & Smith, 1998), we continued analysis controlling for the family income as measured at 17 months of age.

| **Table S1. Descriptive Statistics (means, SD) for all variables including loneliness, physical health and sleep for all time points** | | | | | |
| --- | --- | --- | --- | --- | --- |
|  | | Mean | | SD | Range |
| **Loneliness** | |  | |  |  |
| Loneliness T1 | | 3.84 | | 1.19 | 3–9 |
| Loneliness T2 | | 3.79 | | 1.17 | 3–9 |
| Loneliness T3 | | 3.89 | | 1.23 | 3–9 |
| Early Family Income | | 1.2 | | 0.4 | 1-2 |
| **Health Outcomes** | |  | |  |  |
| Perceived General Health T1 | | 1.41 | | 0.6 | 1-5 |
| Perceived General Health T3 | | 1.42 | | 0.6 | 1-5 |
| Infection T1 | | 6.05 | | 1 | 5-13 |
| Infection T3 | | 6.02 | | 0.88 | 5-13 |
| Antibiotic Use T1 | | 1.17 | | 0.46 | 1-7 |
| Antibiotic Use T3 | | 1.14 | | 0.47 | 1-7 |
| Health Professionals T1 | | 3.74 | | 7.16 | 0 -156 |
| Health Professionals T3 | | 2.42 | | 4.28 | 0 – 53 |
| **Sleep Outcomes** | |  | |  |  |
| Daytime Drowsiness T1 | | 1.22 | | .39 | 1-4 |
| Daytime Drowsiness T3 | | 1.33 | | .42 | 1-4 |
| Total Sleep T1 | | 19.78 | | 1.21 | 14-24 |
| Total Sleep T3 | | 18.03 | | 1.37 | 12-24 |
|  | |  |  | |  |
|  |  | |  | |  |

| **Table S2. Correlations between loneliness, physical health, and sleep across all three time points.** | | | | | | | | | | | | | | | | | | | |
| --- | --- | --- | --- | --- | --- | --- | --- | --- | --- | --- | --- | --- | --- | --- | --- | --- | --- | --- | --- |
|  | 1 | 2 | 3 | 4 | 5 | 6 | 7 | 8 | 9 | 10 | 11 | 12 | 13 | | | 14 | | 15 | 16 |
| **Loneliness** |  |  |  |  |  |  |  |  |  |  |  |  |  | |  | | |  |  |
| Loneliness T1 |  | .287** | .284** | .099** | .029 | .066* | .001 | .030 | -.007 | .066* | .003 | .088** | -.065* | | -.048 | | | -.051 | -.081** |
| Loneliness T2 |  |  | .465** | .059* | .062* | .149** | .009 | .031 | .001 | .043 | .032 | .169** | .001 | | .065* | | | -.065* | -.115** |
| Loneliness T3 |  |  |  | .034 | .013 | .108** | -.004 | .035 | .049 | .029 | .061* | .079* | .091** | | .062* | | | -.020 | -.086** |
| Early Family Income |  |  |  |  | .096** | .110** | .036 | .011 | .037 | .062* | -.020 | -.036 | .044 | | .067* | | | -.049 | .020 |
|  |  |  |  |  |  |  |  |  |  |  |  |  |  | |  | | |  |  |
| **Health Outcomes** | | | | | | | | | | | | | | | | | | | |
| Perceived General Health T1 |  |  |  |  |  | .446* | .202** | .110** | .168** | -.002 | .095** | .054 | .135** | | .114** | | | -.101** | -.010 |
| Perceived General Health T3 |  |  |  |  |  |  | .045 | .125** | .048 | .088** | .095** | .192** | .074* | | .162** | | | -.117** | -.026 |
| Infection T1 |  |  |  |  |  |  |  | .189** | .339** | .058* | .001 | .009 | .096** | | .008 | | | -.008 | -.019 |
| Infection T3 |  |  |  |  |  |  |  |  | .049 | .192** | .039 | .103** | .005 | | .025 | | | -.045 | -.040 |
| Antibiotic Use T1 |  |  |  |  |  |  |  |  |  | .106** | .005 | .039 | .002 | | .023 | | | .002 | .067* |
| Antibiotic Use T3 |  |  |  |  |  |  |  |  |  |  | .021 | .254** | -.010 | | .040 | | | .025 | .009 |
| Health Professionals T1 |  |  |  |  |  |  |  |  |  |  |  | .137** | .071** | | .072 | | | -.040 | .016 |
| Health Professionals T3 |  |  |  |  |  |  |  |  |  |  |  |  | .037 | | .066* | | | -.047 | -.031 |
|  |  |  |  |  |  |  |  |  |  |  |  |  |  | |  | | |  |  |
| **Sleep Outcomes** | | | | | | | | | | | | | | | | | | | |
| Daytime Drowsiness T1 |  |  |  |  |  |  |  |  |  |  |  |  |  | | .468** | | | -.049 | -.110** |
| Daytime Drowsiness T3 |  |  |  |  |  |  |  |  |  |  |  |  |  | |  | | | -.041 | -.112** |
| Total Sleep T1 |  |  |  |  |  |  |  |  |  |  |  |  |  | |  | | |  | .324** |
| Total Sleep T3 |  |  |  |  |  |  |  |  |  |  |  |  |  |  | | | |  |  |
|  |  |  |  |  |  |  |  |  |  |  |  |  |  |  | | |  | |  |
| Notes: *p < .05; ** p < .001. | | | | | | | | | | | | | | | | | | | |
